# Supplementary material for: Evaluation of some quinoline-based hydrazone derivatives as insecticidal agents
Source: Royal Society of Chemistry journal article supplement (doi:10.1039/c6ra00993j), 2016-01-01

## **Evaluation of some quinoline-based hydrazone derivatives as insecticidal agents**

Xiang Yu,<sup>a</sup> Gang Feng,<sup>b</sup> Jiulin Huang<sup>a</sup> and Hui Xu<sup>\*a</sup>

*<sup>a</sup>Research Institute of Pesticidal Design & Synthesis, College of Sciences, Northwest A&F University, Yangling 712100, Shaanxi Province, People's Republic of China.*

*<sup>b</sup>Environment and Plant Protection Institute, Chinese Academy of Tropical Agricultural Science, Haikou 571101, Hainan Province, People's Republic of China.*

\*Author to whom correspondence should be addressed [(H.X.) E-mail: [orgxuhui@nwsuaf.edu.cn](mailto:orgxuhui@nwsuaf.edu.cn); Tel: +86-29-87091952; Fax: +86-29-87091952].

<sup>1</sup>H-NMR and <sup>13</sup>C-NMR spectra for the some typical target compounds **3a**, **3b**, **4a**, **4b**, **5a**, **5b**, **6a** and **6b**.

<sup>1</sup>H NMR 3a

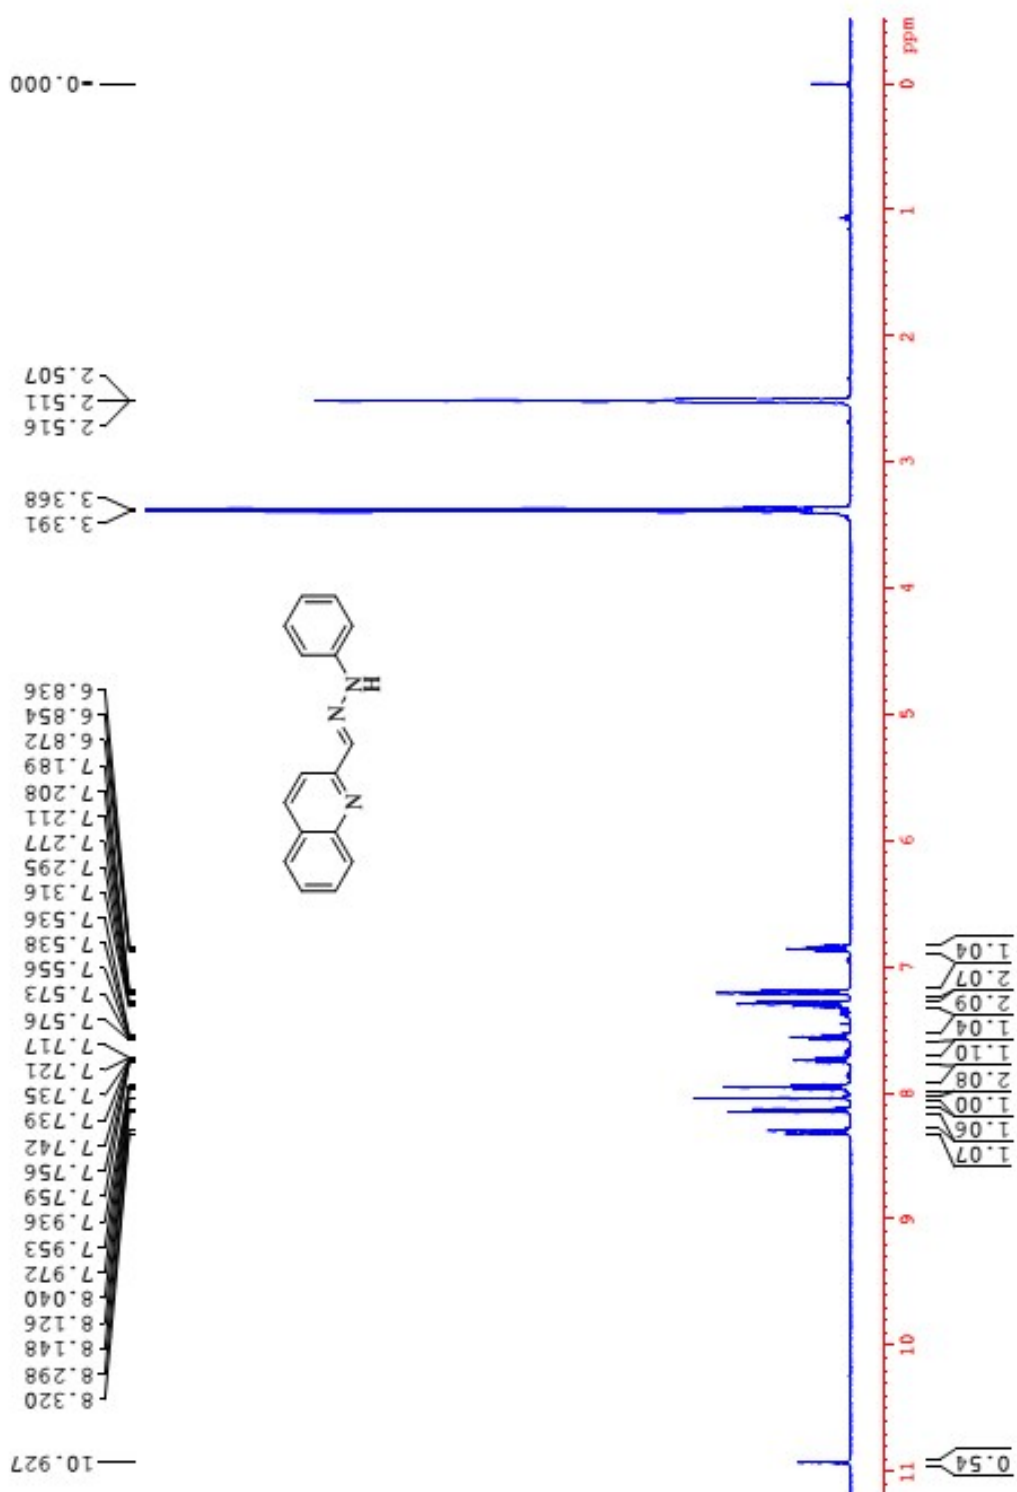

<sup>13</sup>C NMR 3a

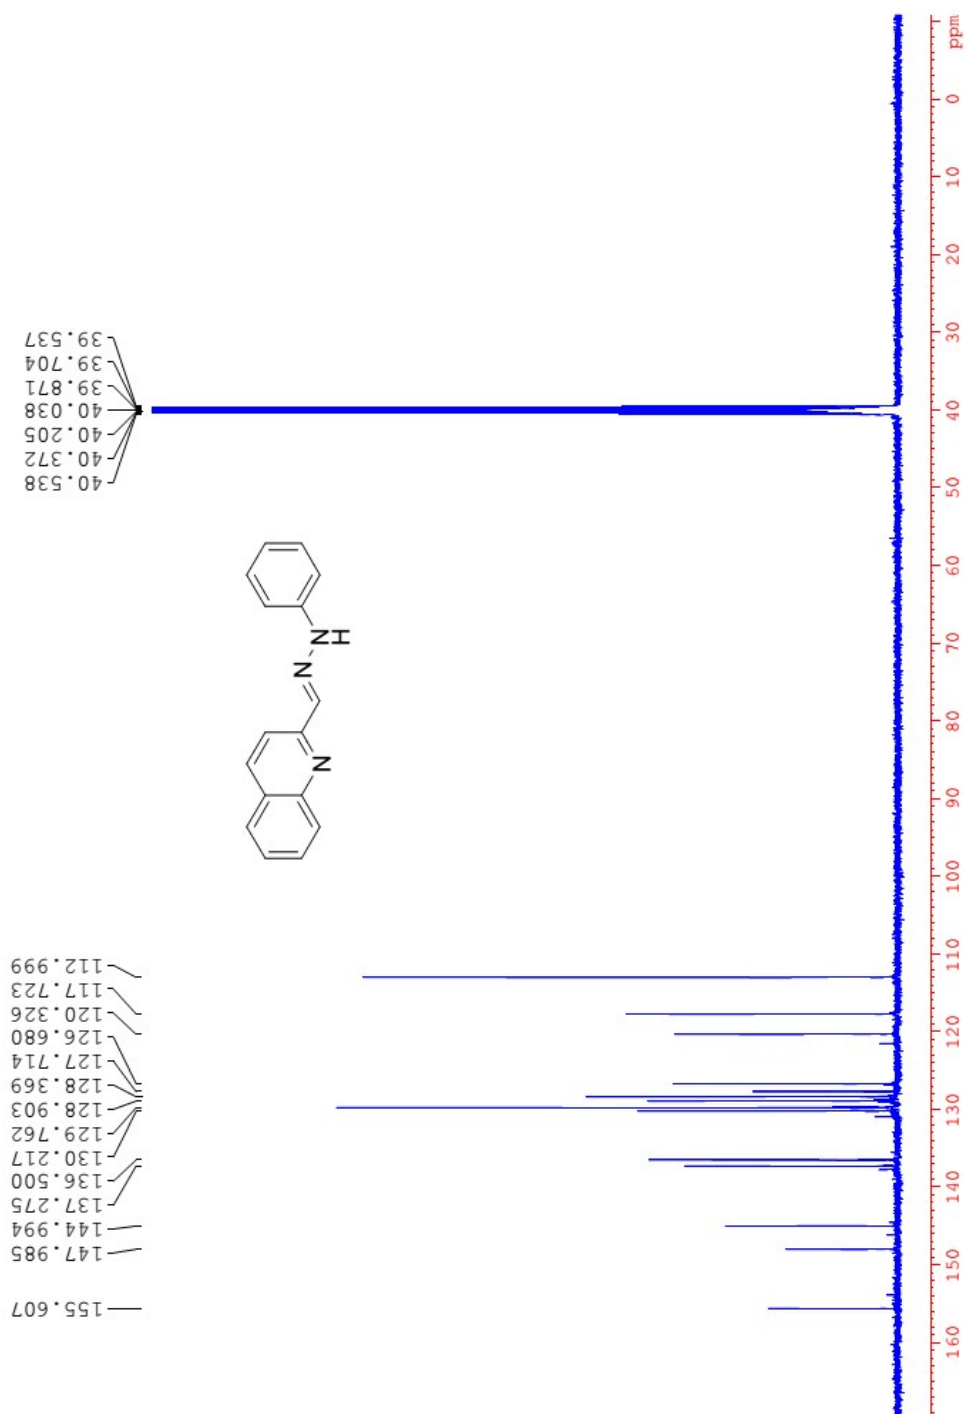

<sup>1</sup>H NMR 3b

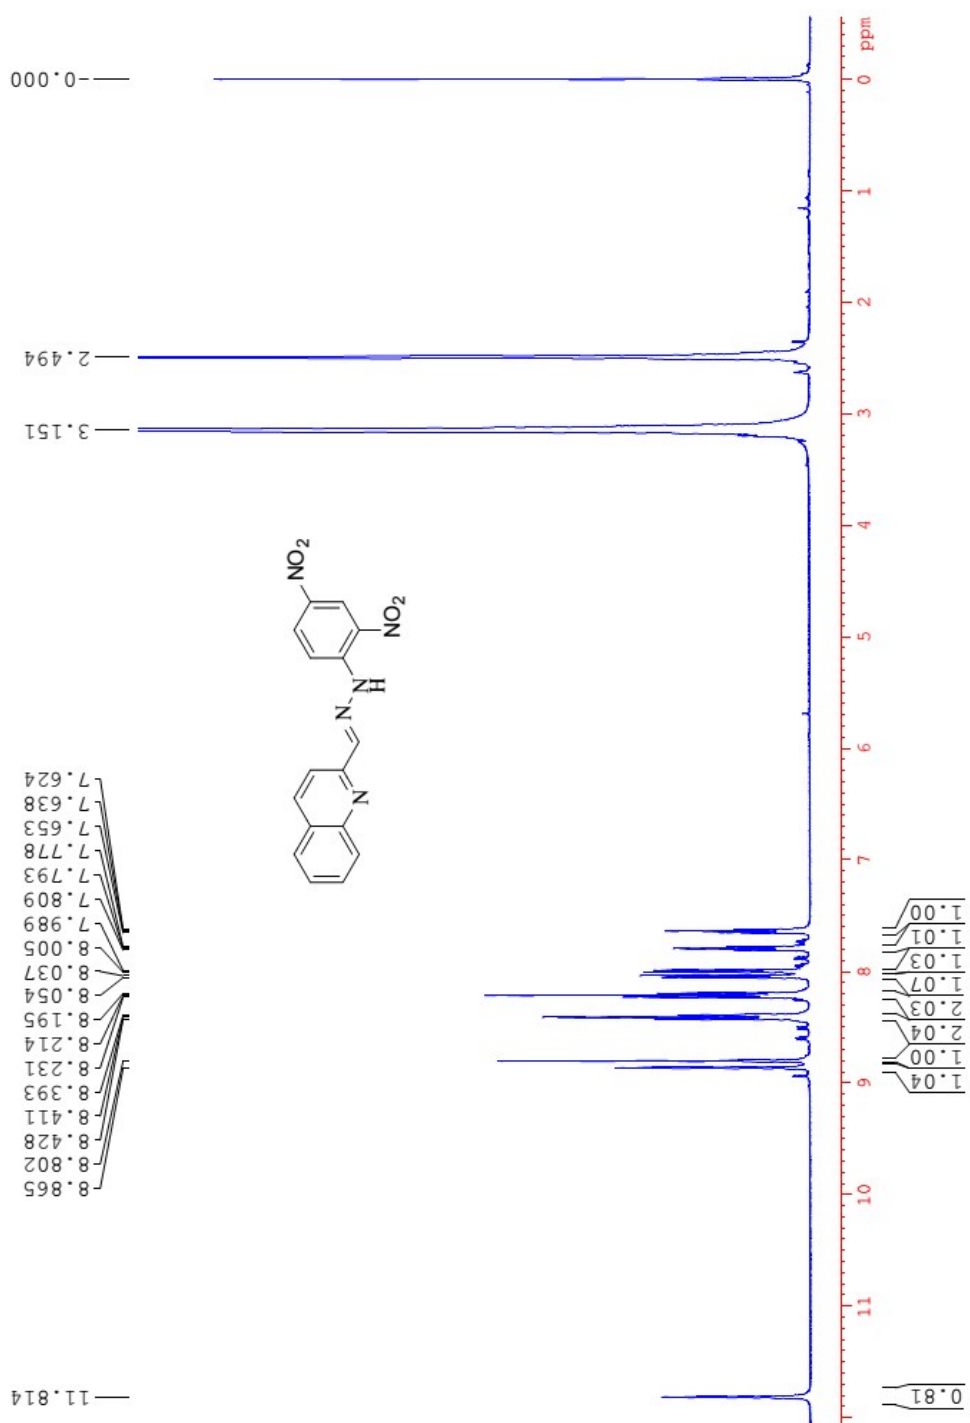

<sup>13</sup>C NMR 3b

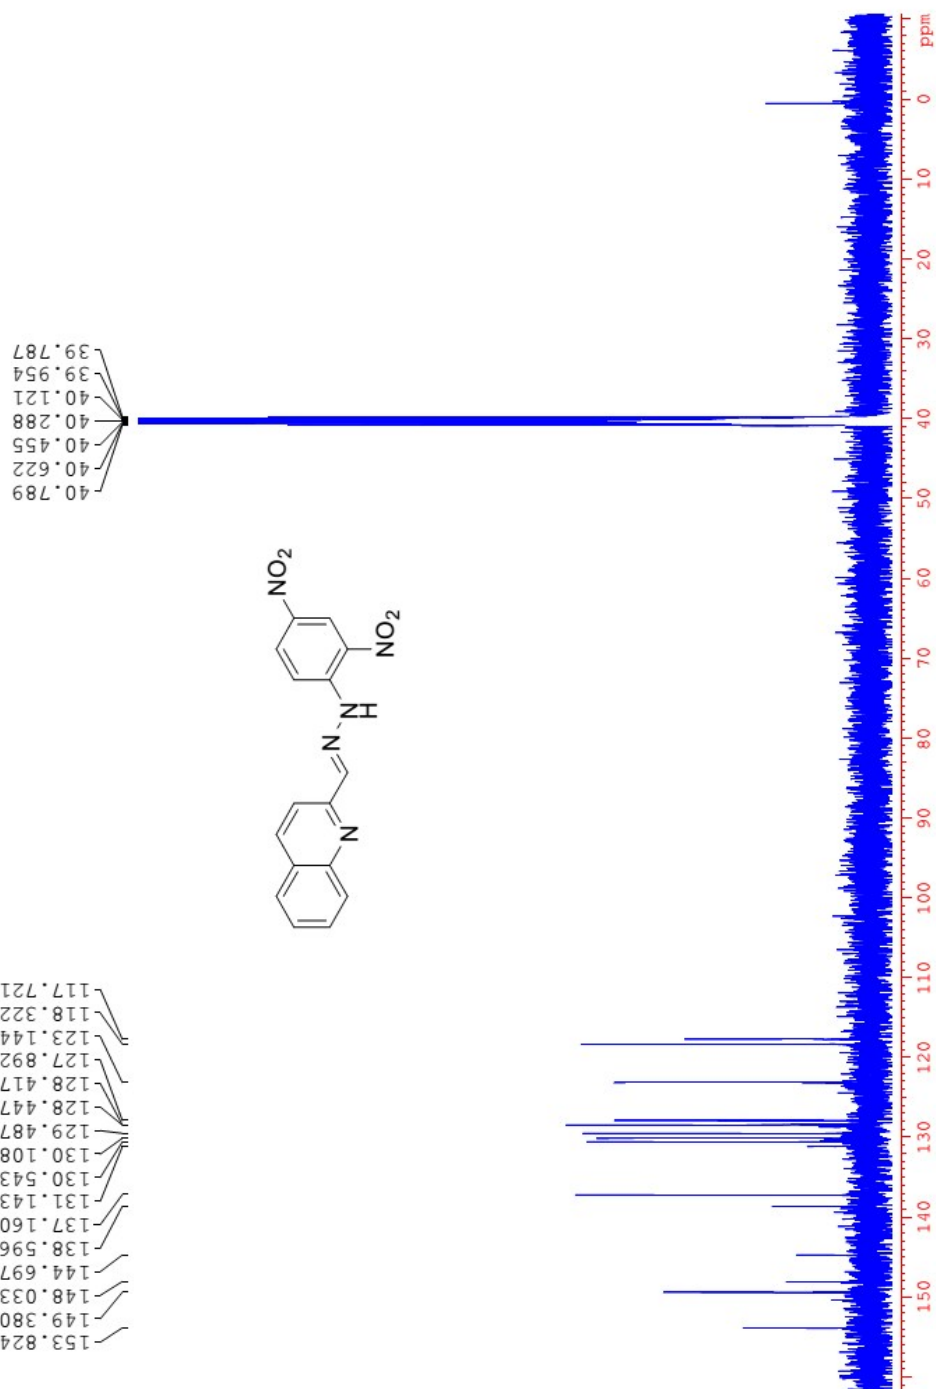

# <sup>1</sup>H NMR 4a

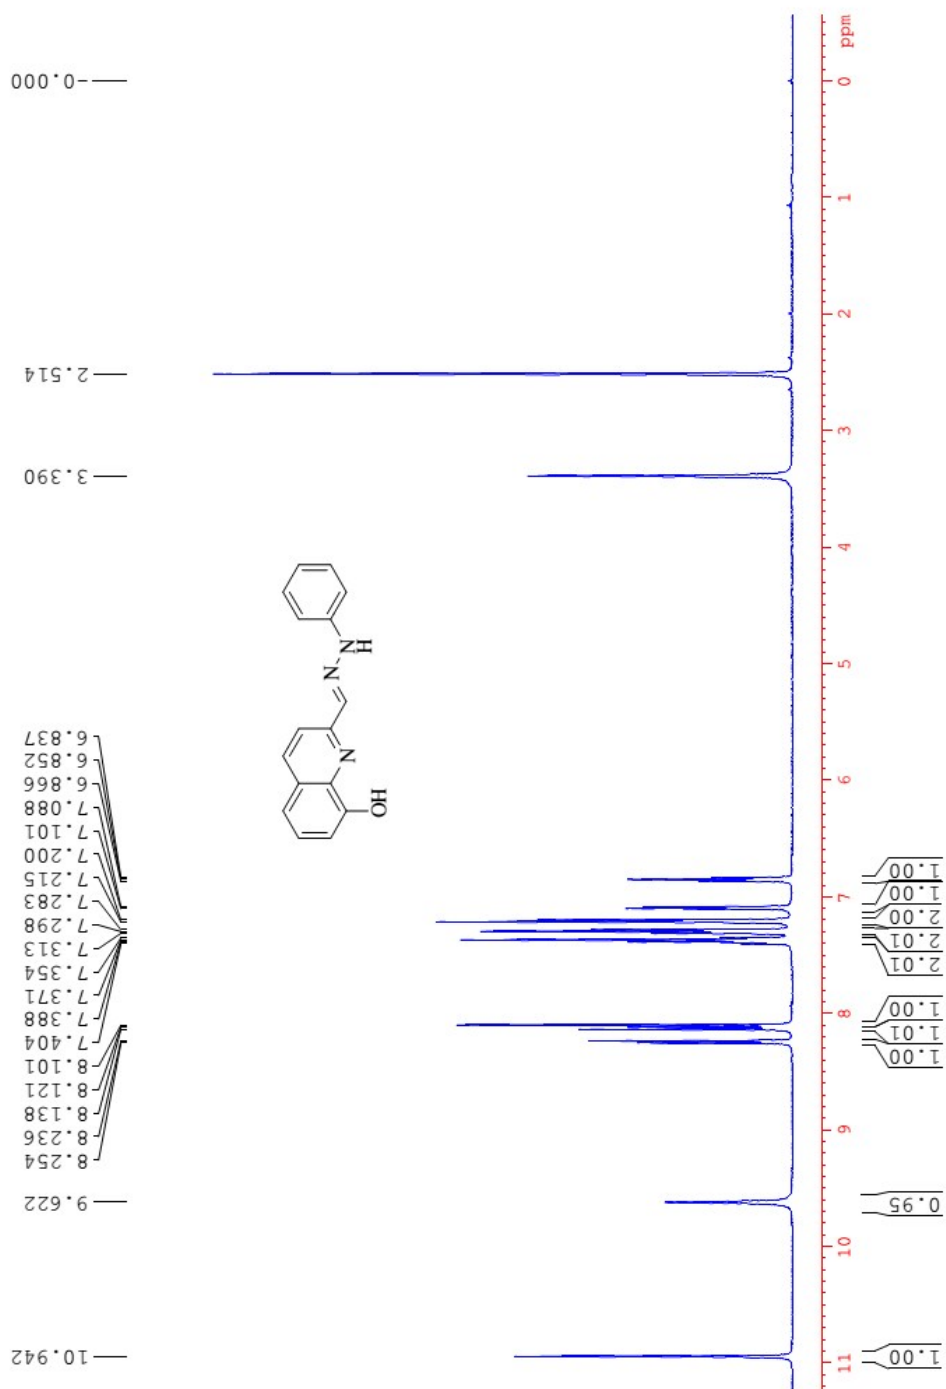

<sup>13</sup>C NMR 4a

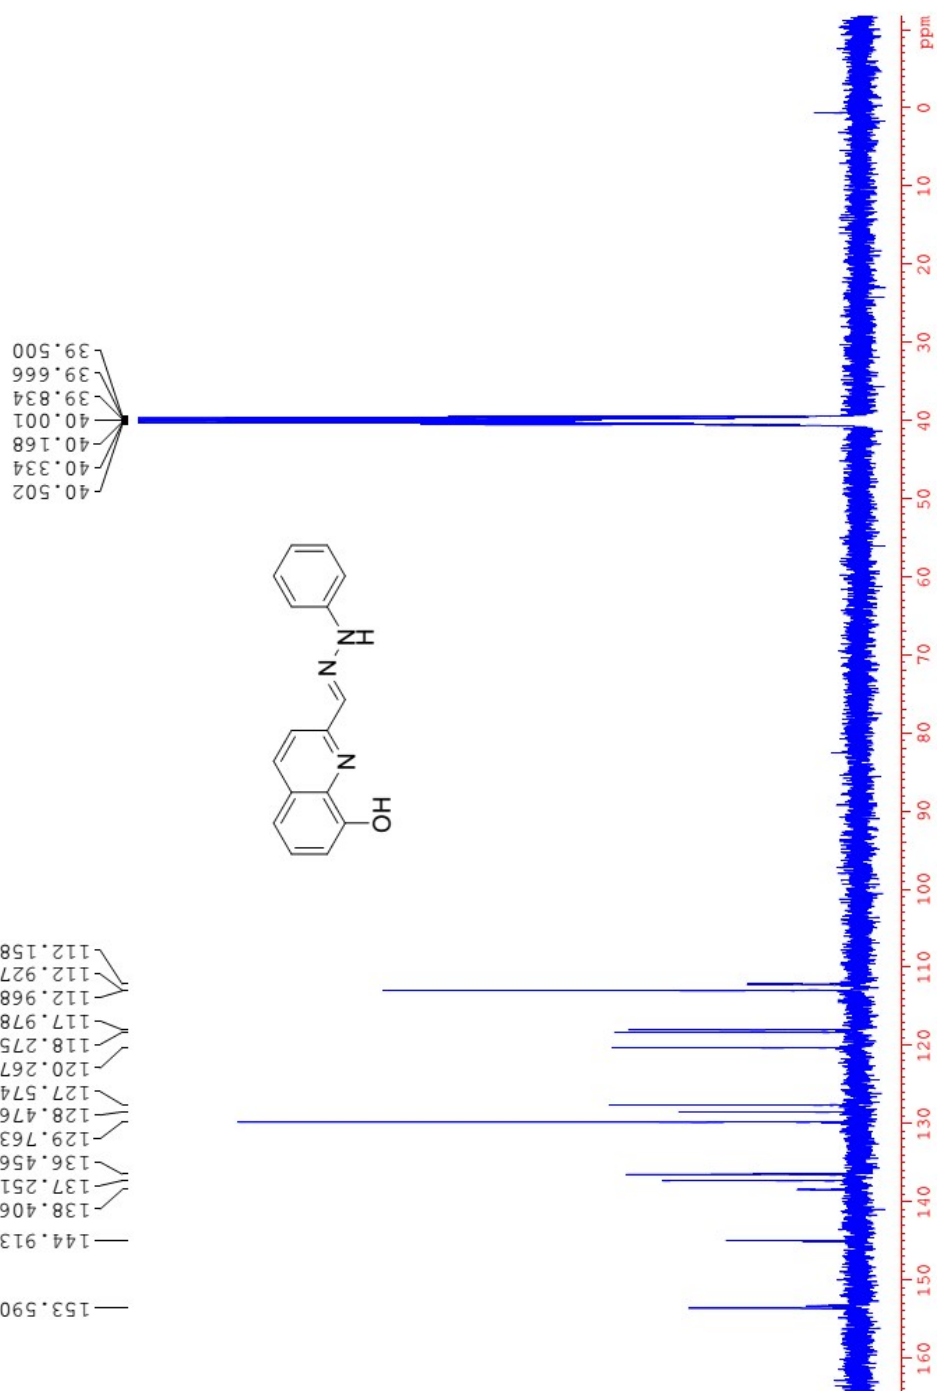

<sup>1</sup>H NMR 4b

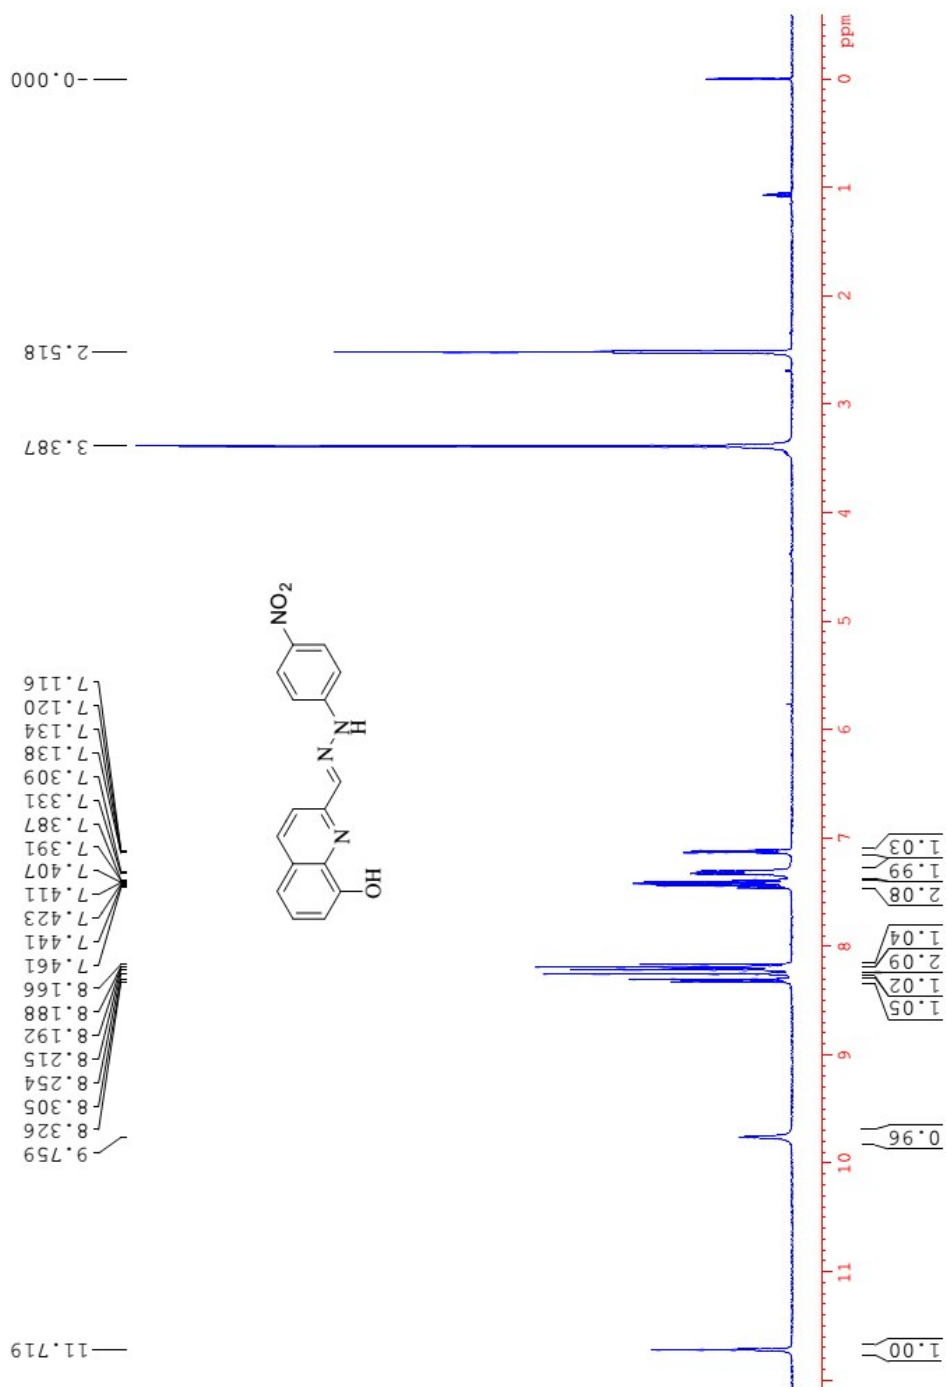



<sup>13</sup>C NMR 4b

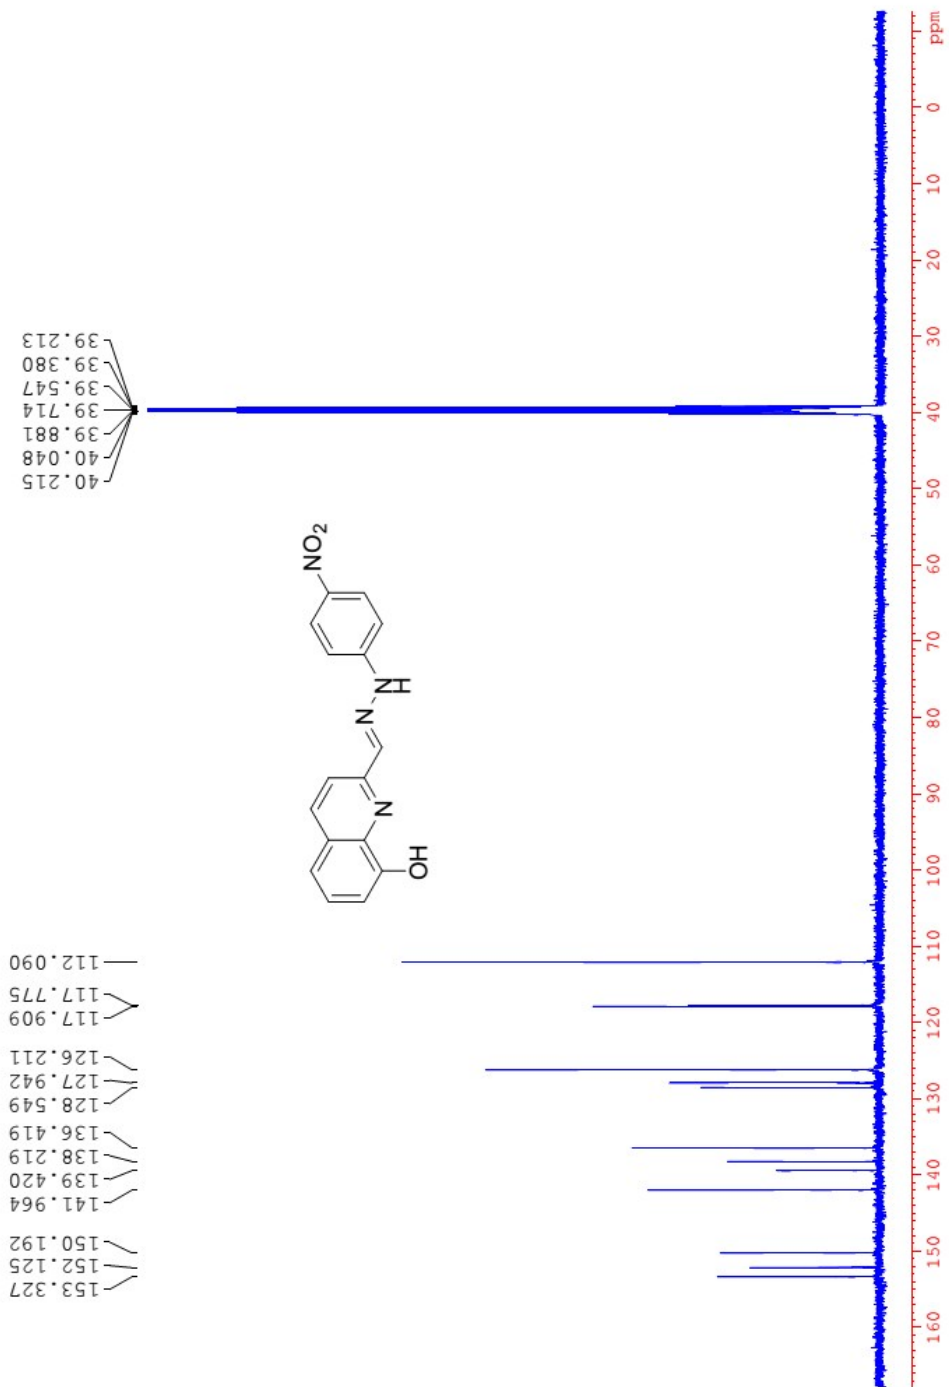

<sup>1</sup>H NMR 5a

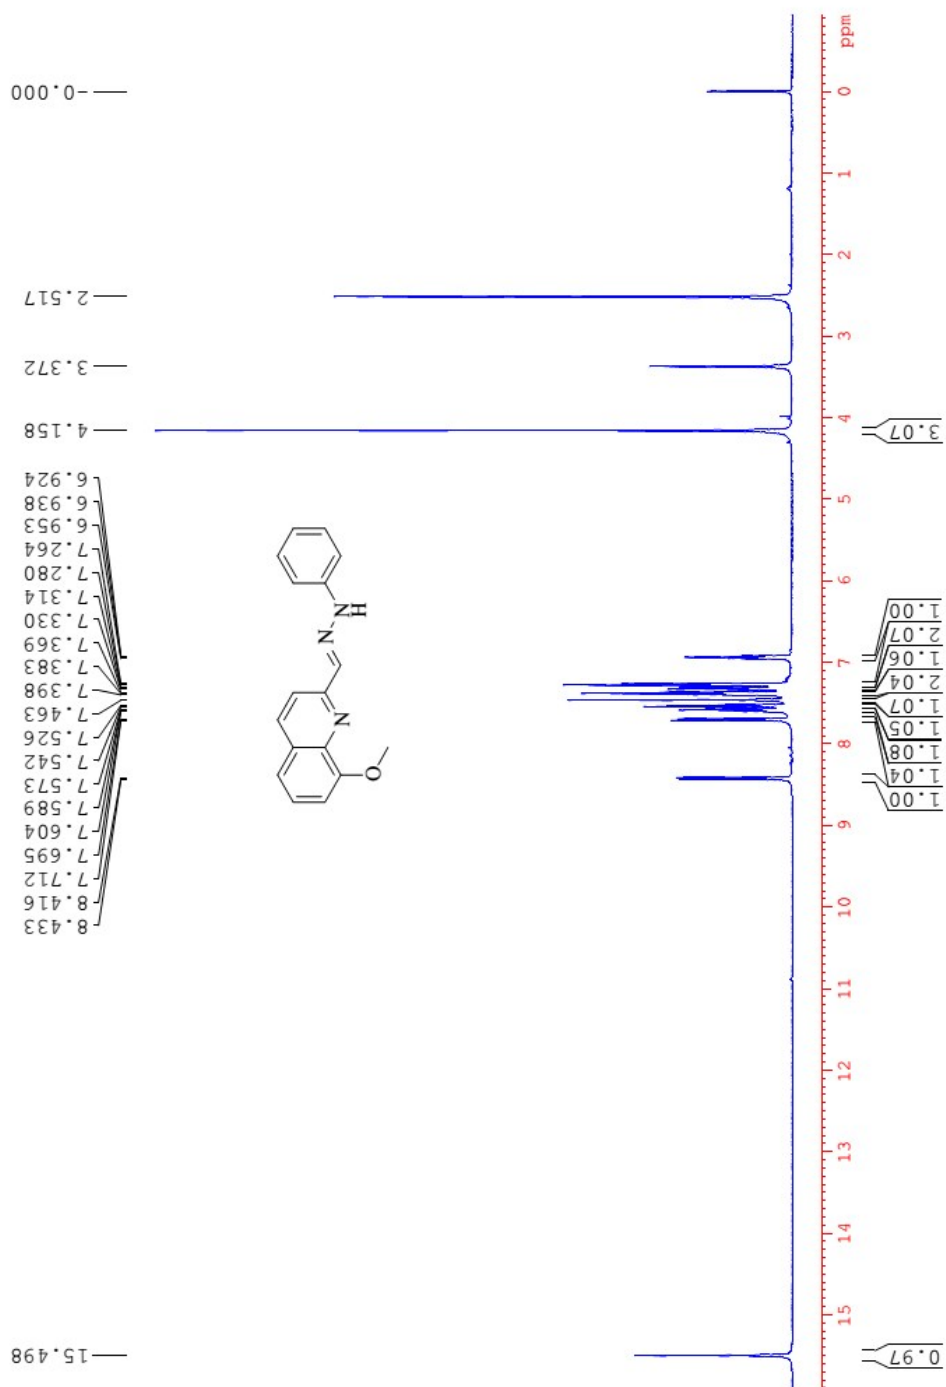

<sup>13</sup>C NMR 5a

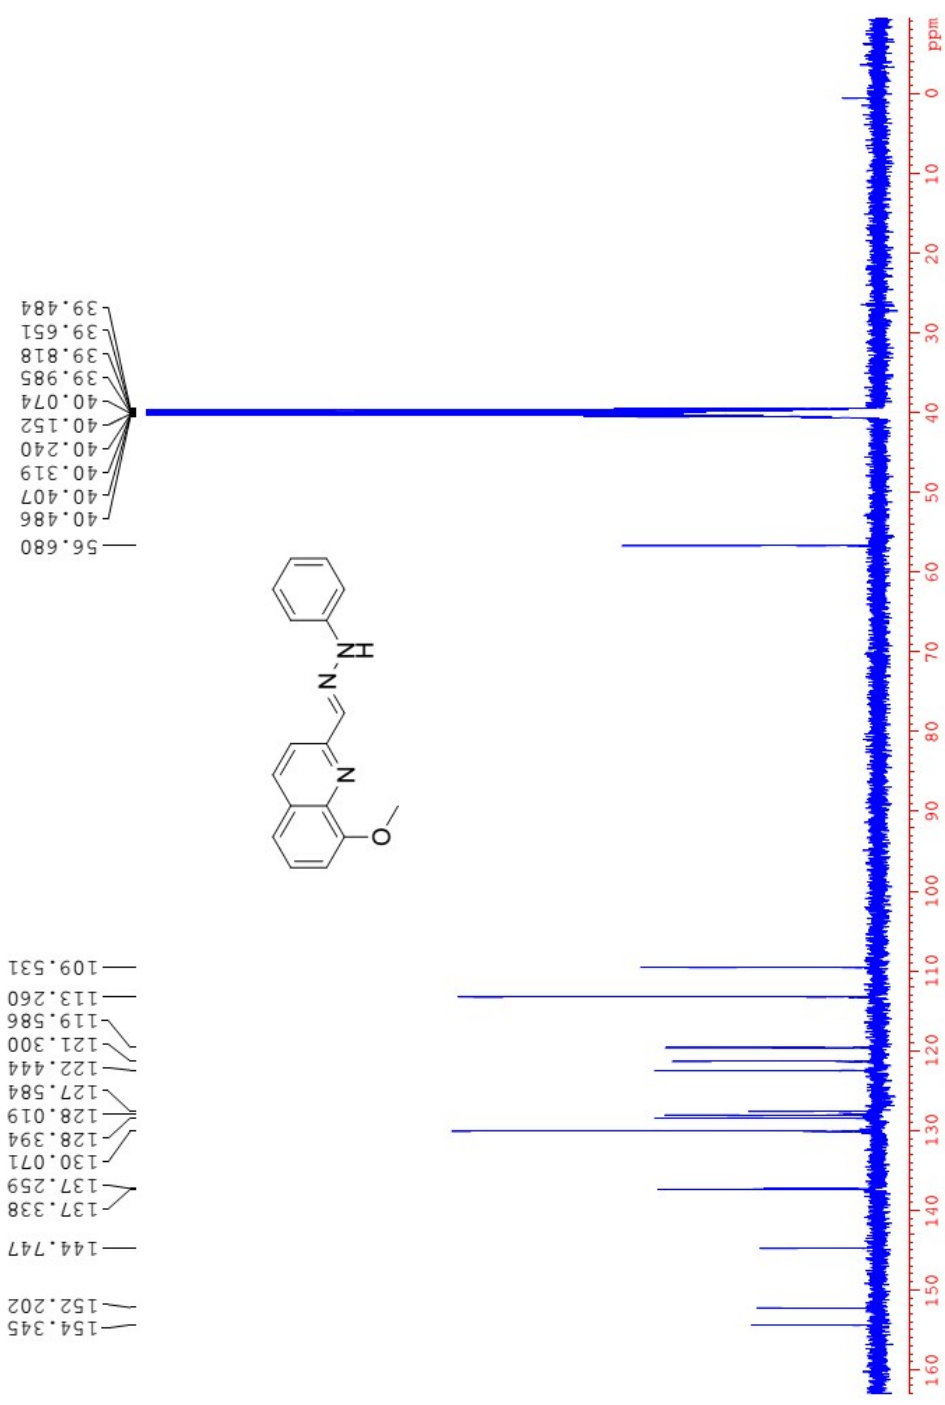

<sup>1</sup>H NMR 5b

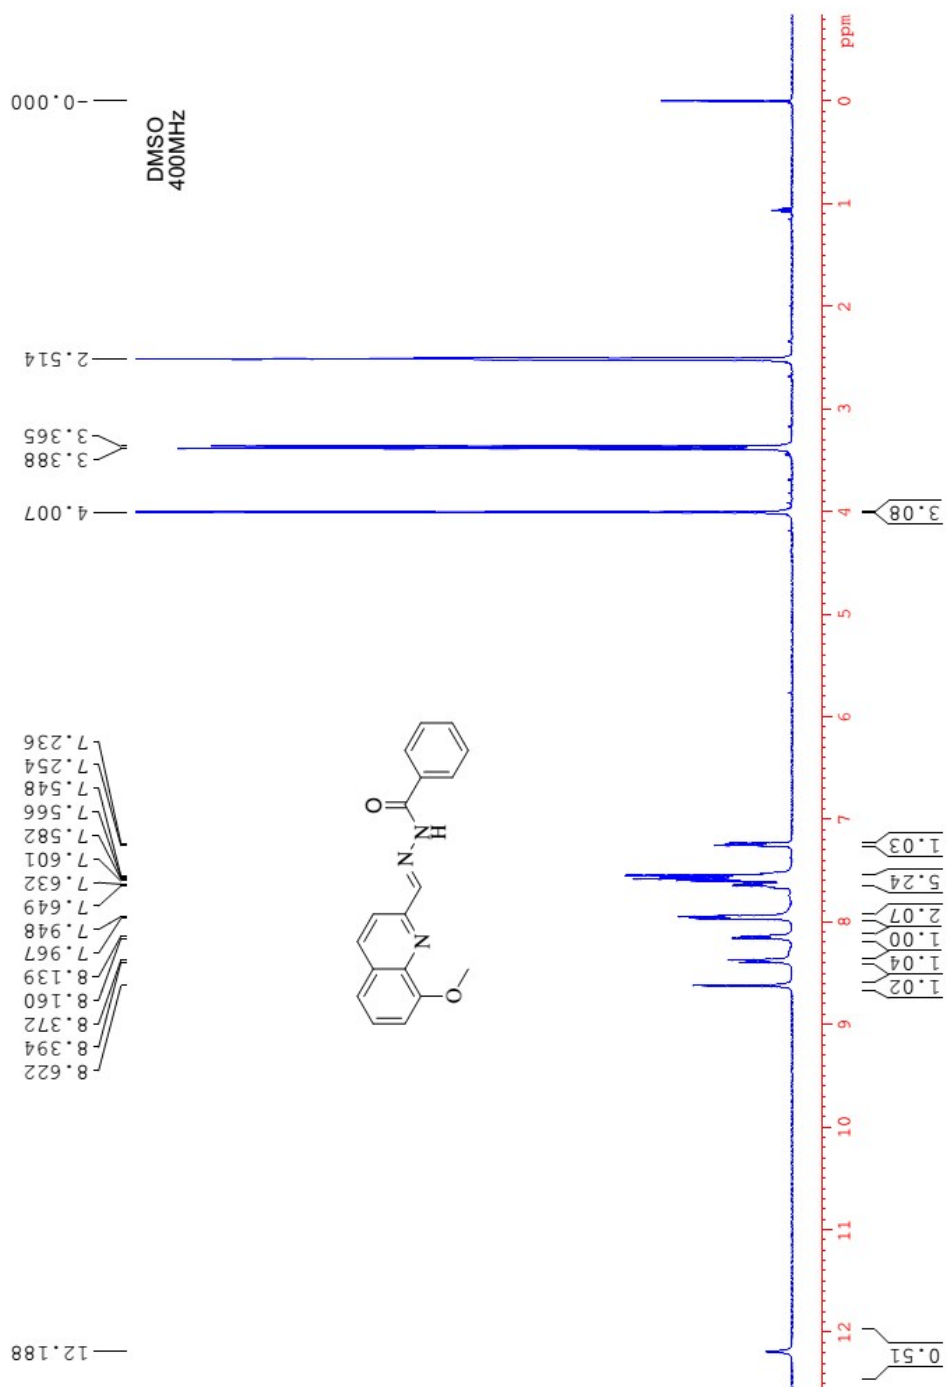

<sup>13</sup>C NMR 5b

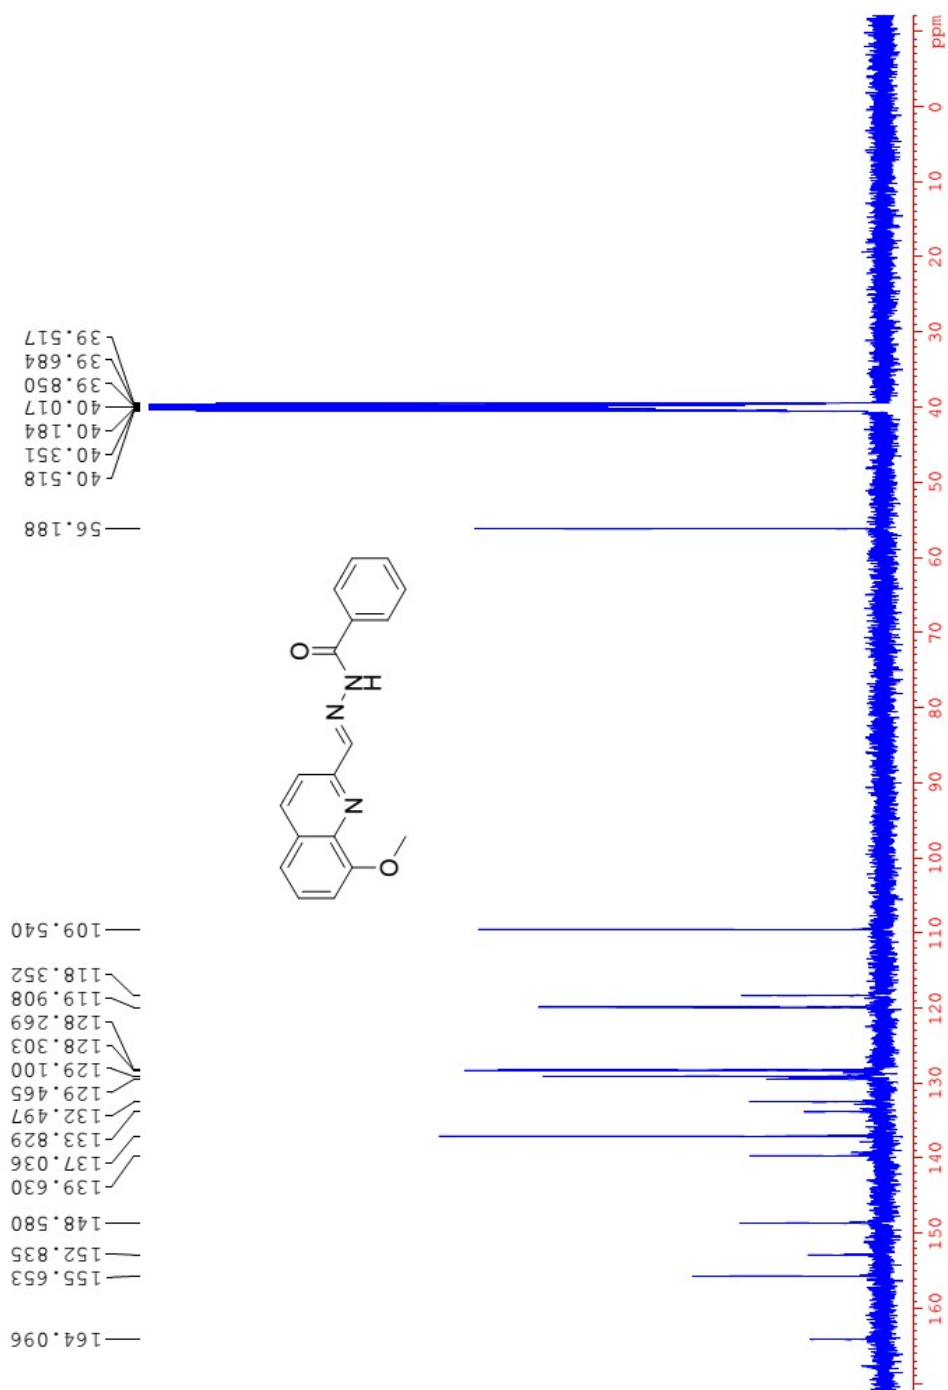

# <sup>1</sup>H NMR 6a

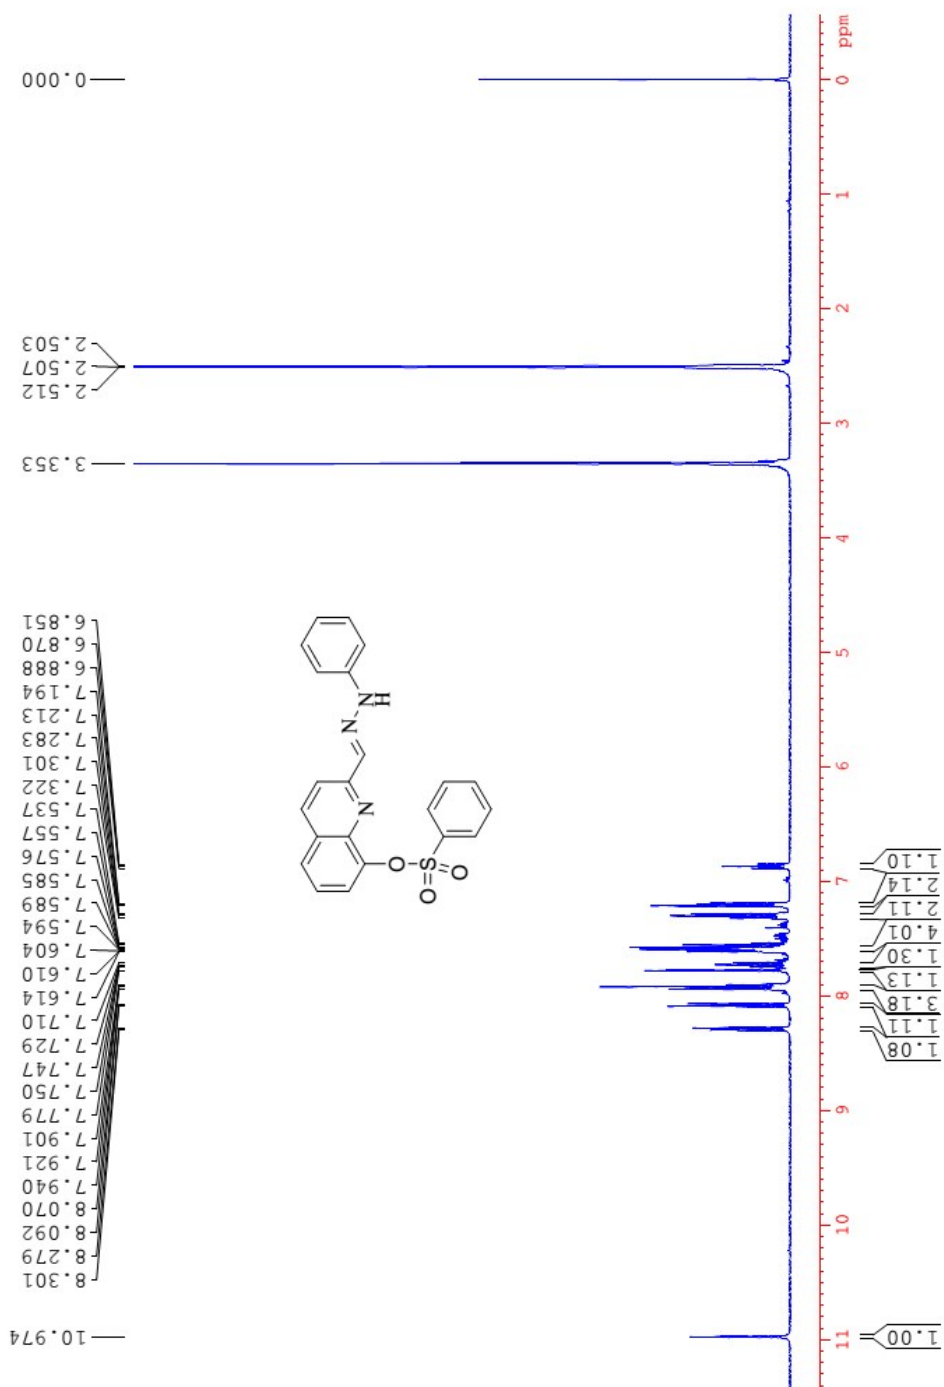

<sup>13</sup>C NMR 6a

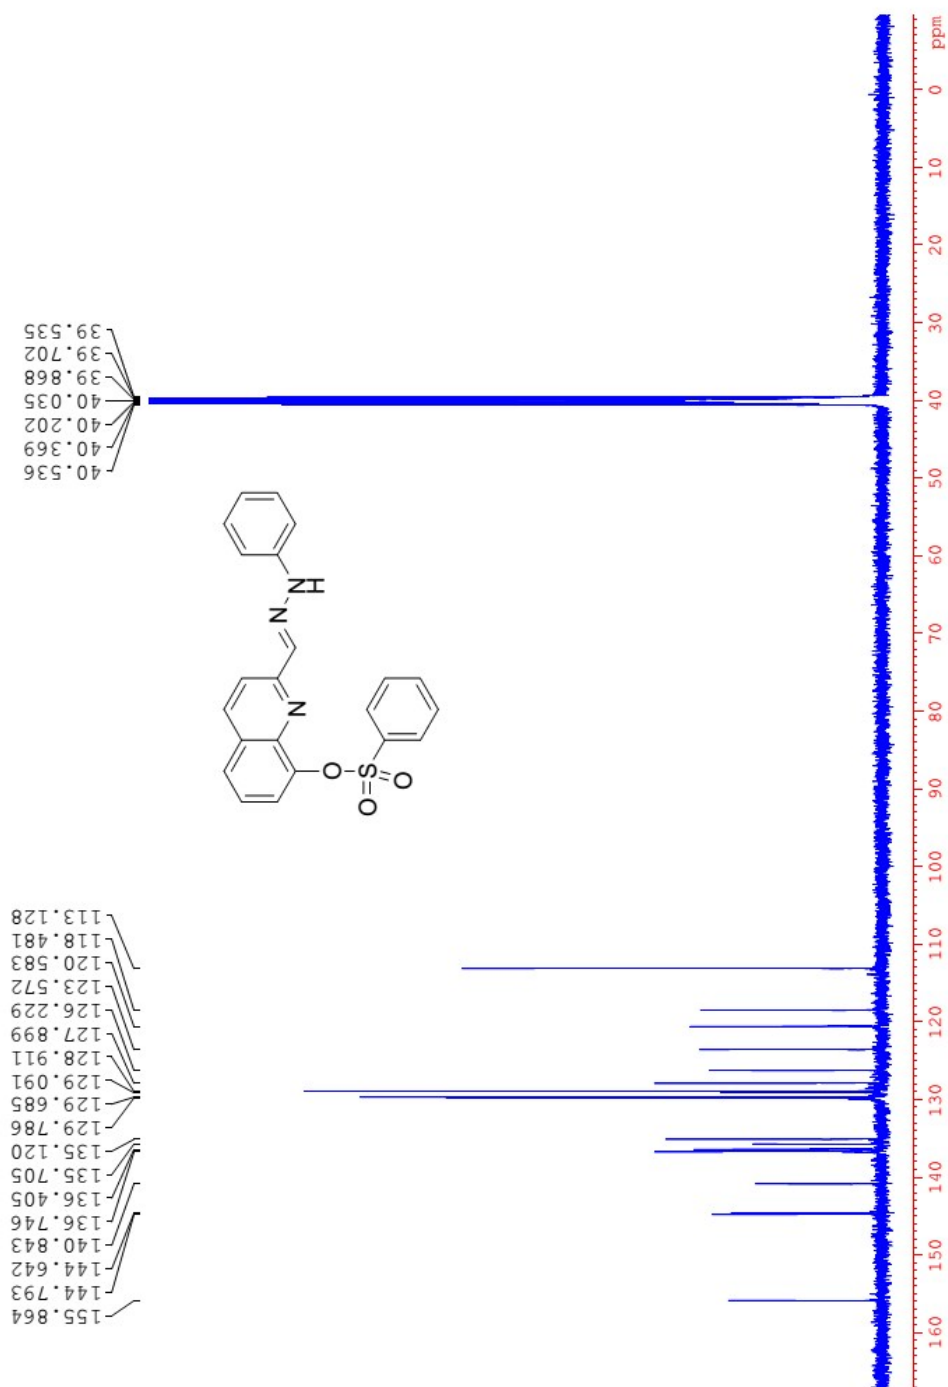

<sup>1</sup>H NMR 9b

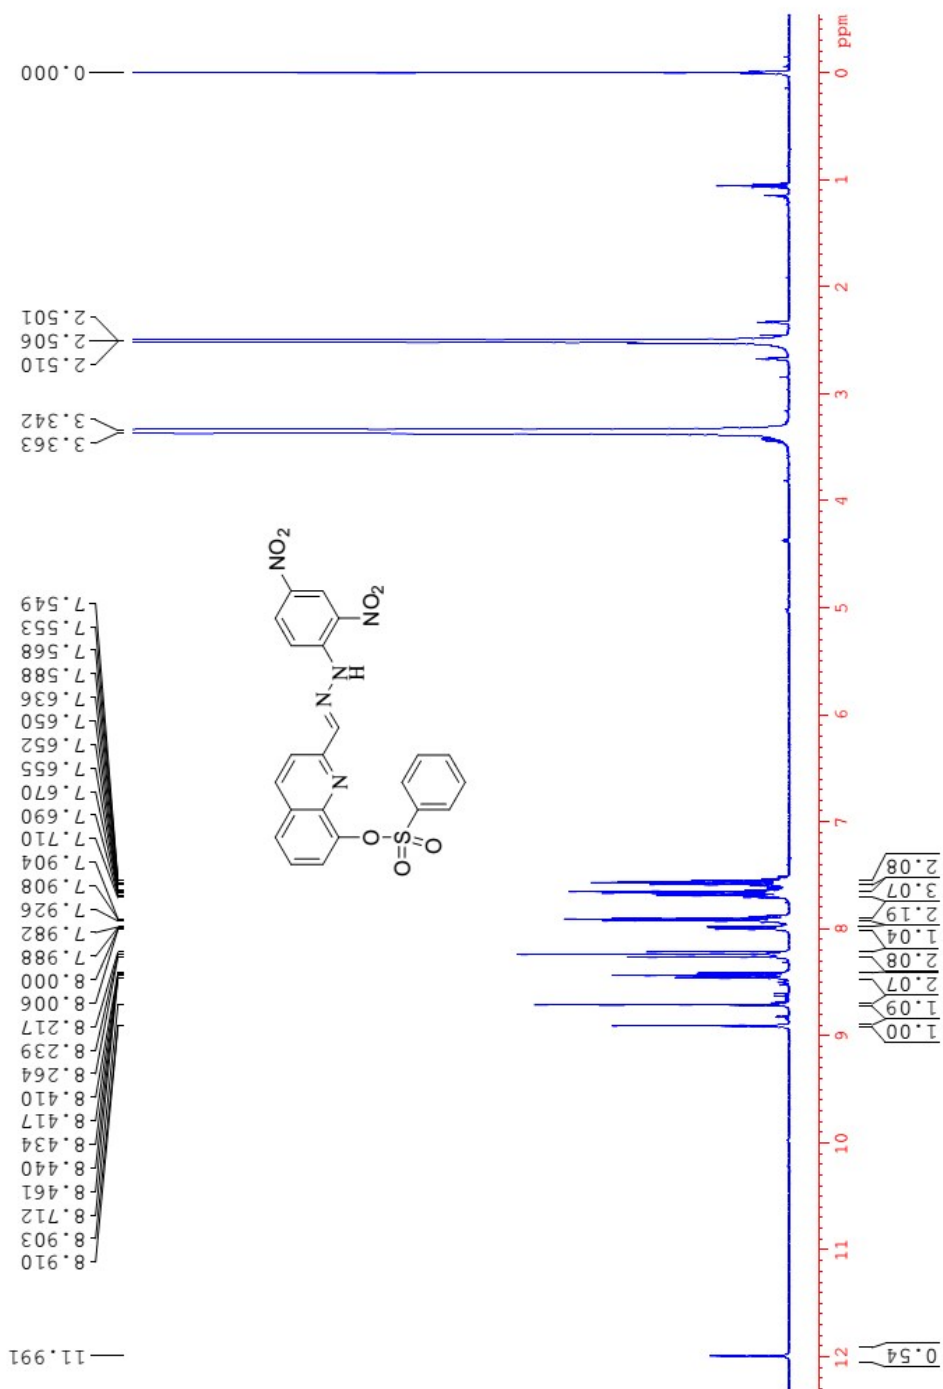



<sup>13</sup>C NMR 6b

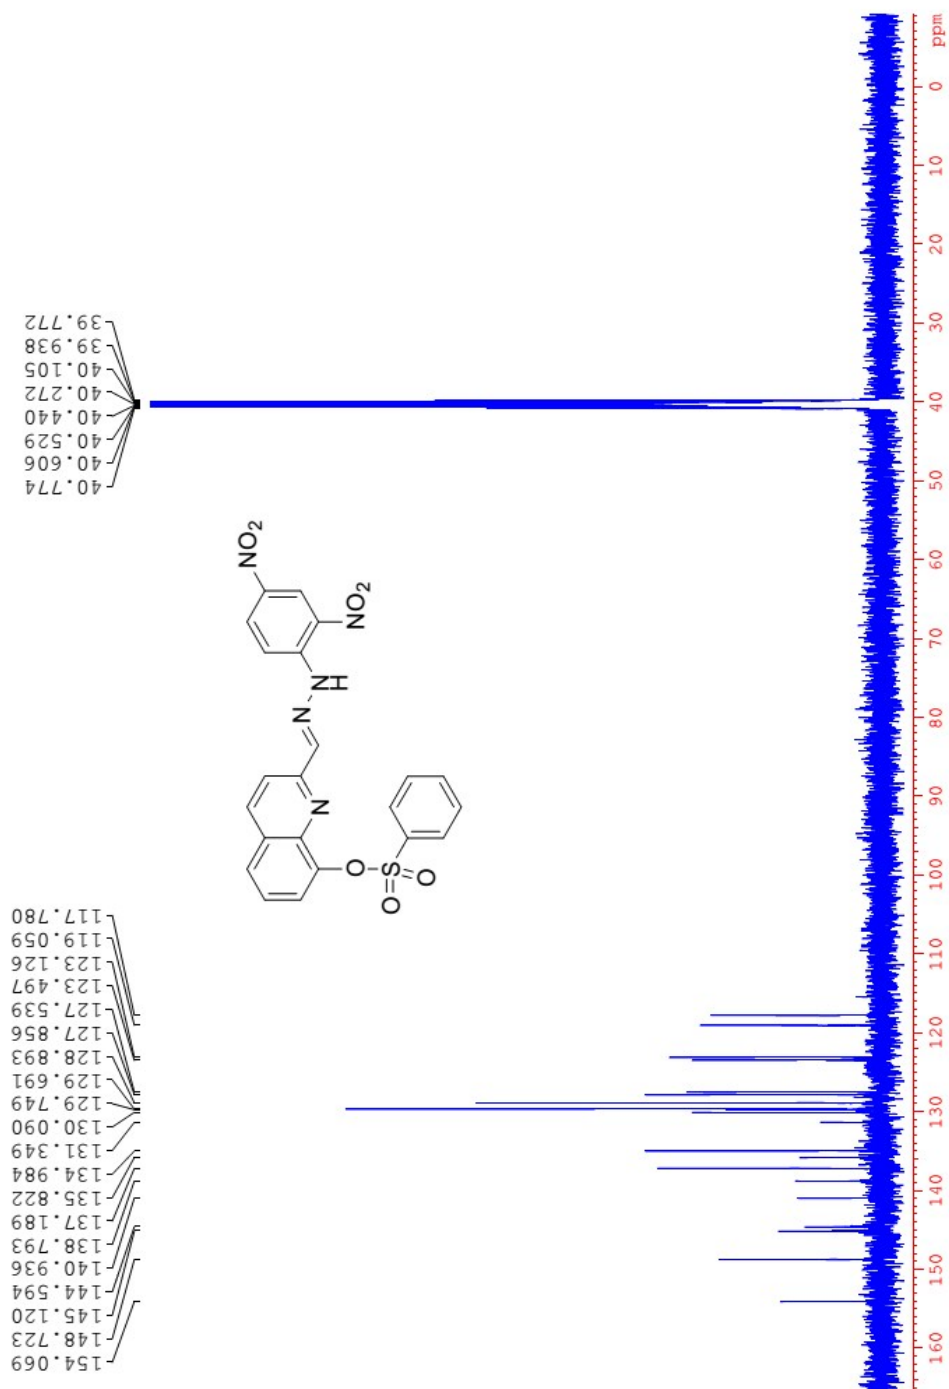

Supplement: c6ra00993j1.pdf [file c6ra00993j1.pdf]
